# Supplementary material for: SARS-CoV-2 Infection of Rhesus Macaques Treated Early with Human COVID-19 Convalescent Plasma
Source: PubMed Central journal article supplement (PMC8612156; doi:10.1128/spectrum.01397-21), 2021-11-24

**Fig. S1.** Impact of CP treatment on viral burden. **(A, B)** Median vRNA and full-length (gRNA) levels in nasal lavages (A) and tracheal aspirates (B). The dashed line indicates limit of detection. **(C)** Results of Area under the curve analysis of total vRNA, full-length (gRNA) and sgRNA levels in nasal lavages and tracheal aspirates. Bars show mean with SEM.  $n=2$  (CP treatment),  $n=2$  (NP treatment), and  $n=4$  (not treated).

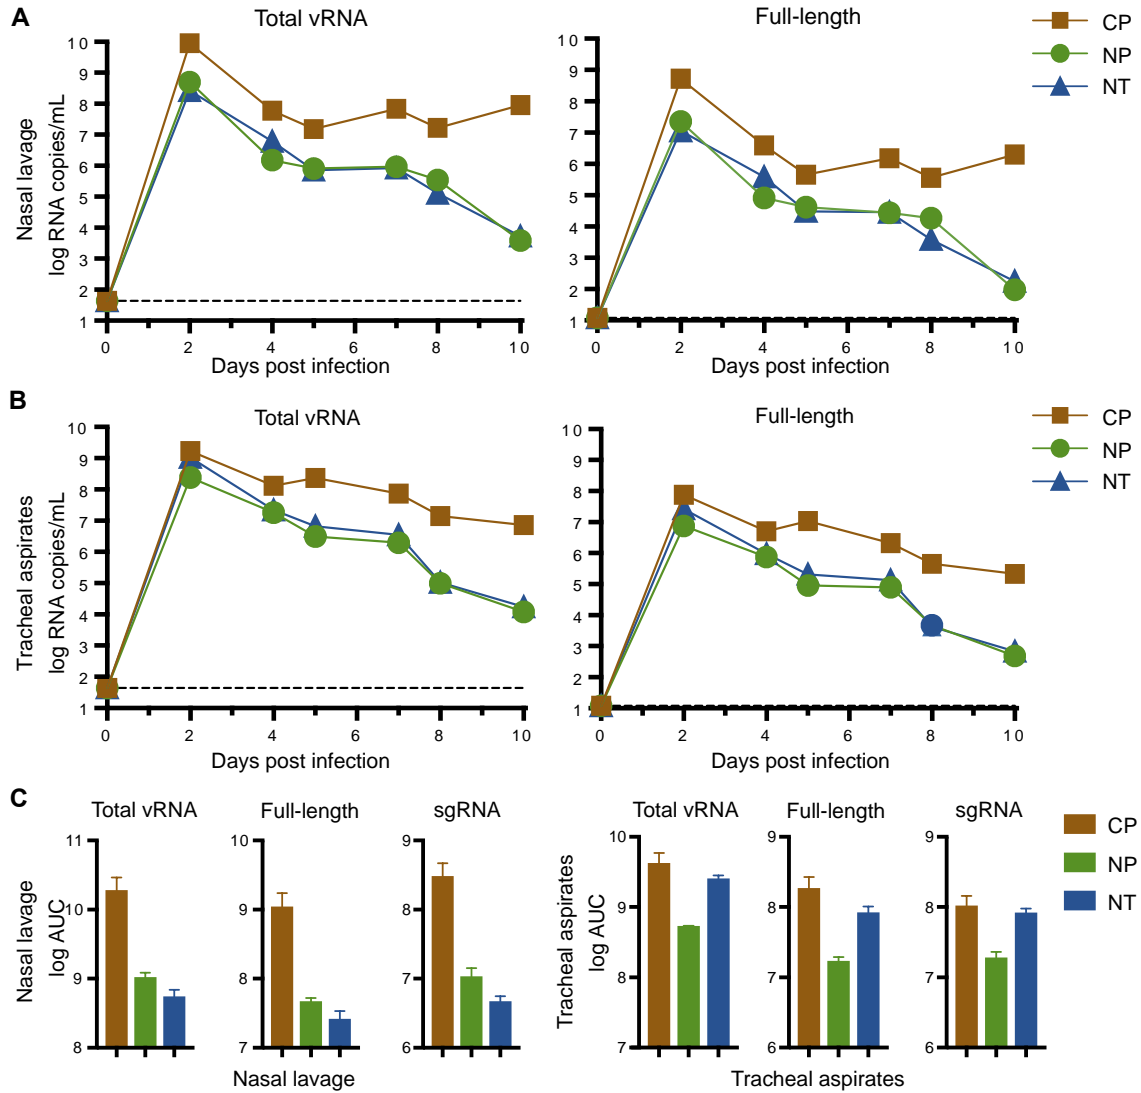

**Fig. S2.** Clinical markers of infection and COVID-19. Graphs show measurements in individual animals over time.

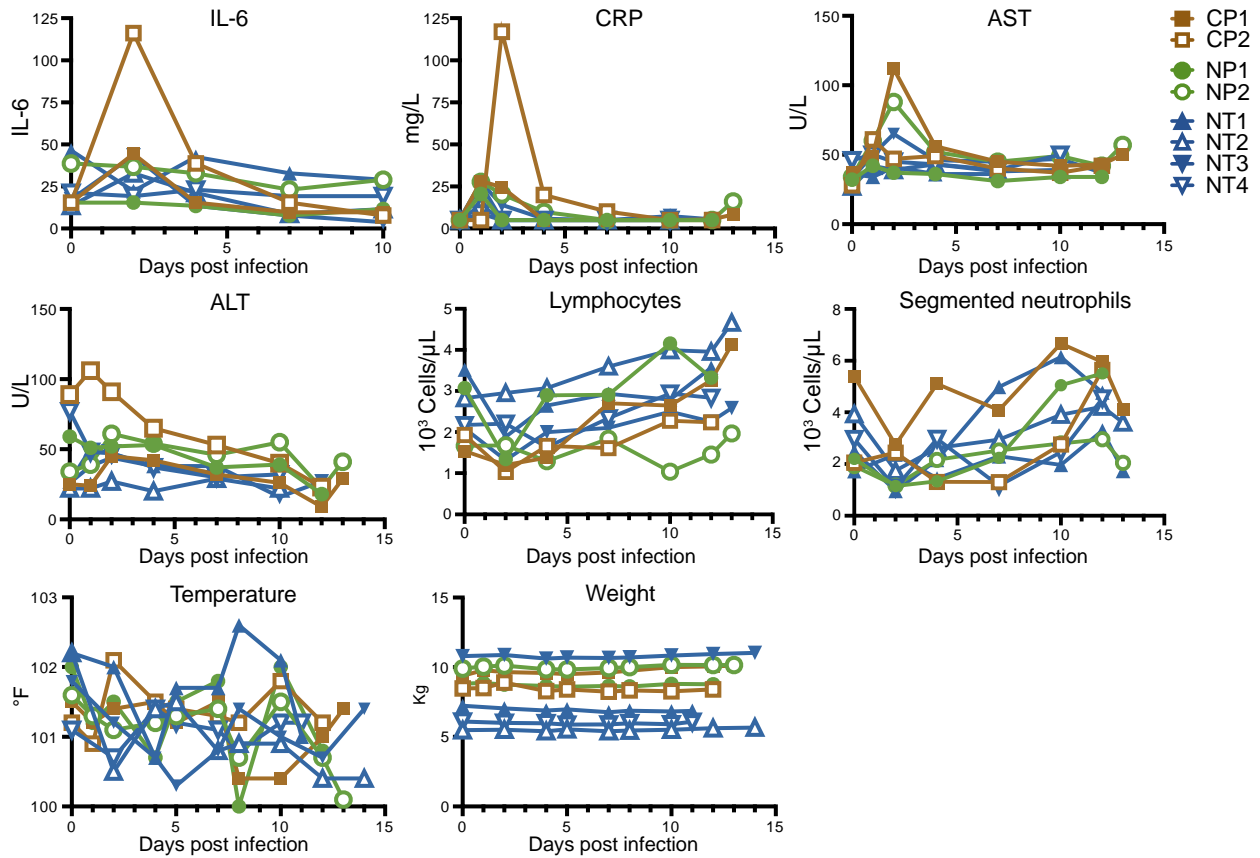

**Fig. S3.** Analysis of intra-host polymorphisms. **(A)** Read depths between the amplicon sequence approach (ARTIC) and metagenomic sequencing (mNGS). **(B)** Relationship between nucleotide diversity and viral loads. **(C)** Allele frequencies in recovered viral genomes.

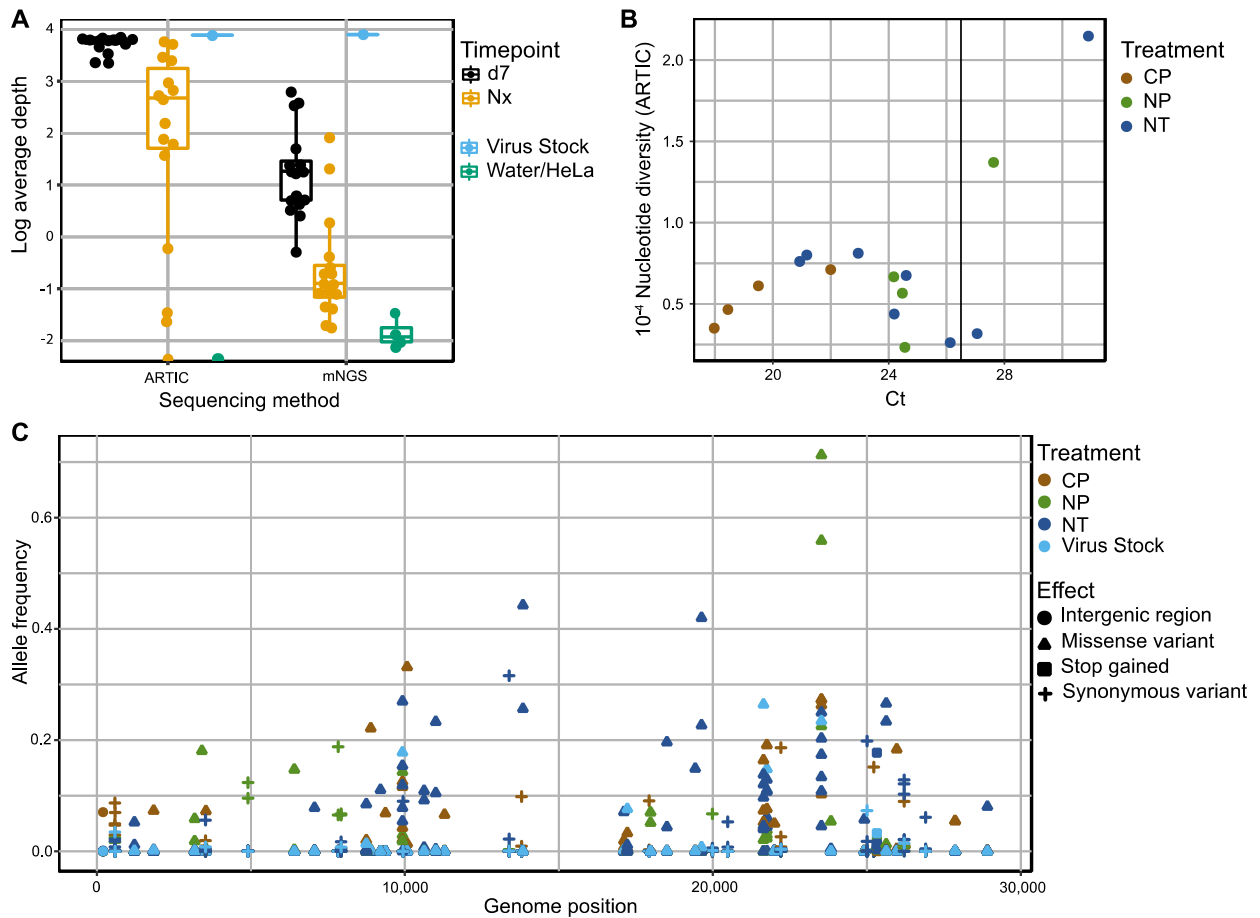

Supplement: spectrum.01397-21-s0001.pdf [file spectrum.01397-21-s0001.pdf]
